# Supplementary material
Source: Springer Nature journal article supplement (https://www.springermedizin.de/resource/supplementary/13048_2010_59_MOESM2_ESM.pdf/9664822)
Supplement: MOESM2 [file 9664822]

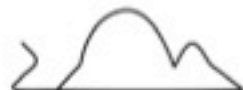

**A. HOMEOSTASIS**

Regulated  
Apoptosis  
Suppressor  
Treg

SELF-TOLERANCE TO  
OOCYTE ANTIGENS

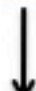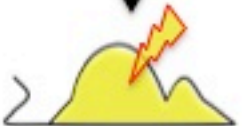

**B. OVOTOXIC CT**

Increased  
Apoptosis  
Depleted  
Treg  
T-Cell  
Activation

AUTOIMMUNITY  
Oocyte Clearance

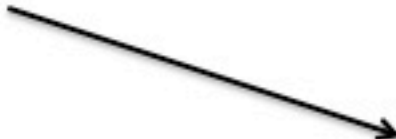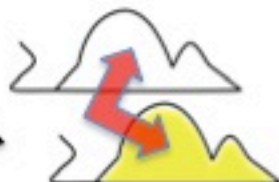

**D. PARABIOSIS**

Infiltrating  
Suppressor  
Treg

SELF-TOLERANCE  
Oocyte Survival?

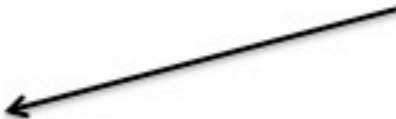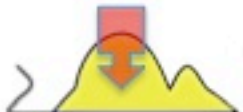

**C. SYNGENEIC BMT**

Restored  
Suppressor  
Treg

SELF-TOLERANCE  
Oocyte Survival
